# Supplementary material for: Guideline-Adherent Hypertension in Children and Adolescents: A Multi-Institutional Database Analysis from Taiwan
Source: MDPI journal article supplement (doi:10.3390/jcm12134367), 2023-06-28
Supplement: s1 [file s1]

Table S1 Characteristics of children and adolescents at the first blood pressure measurement in the entire study period

|                                                 | Overall       | 1-7 y         | 8-12 y        | 13-17 y       | 18-20 y       |
|-------------------------------------------------|---------------|---------------|---------------|---------------|---------------|
| Number of patient evaluated, n                  | 12469         | 1428          | 2262          | 5288          | 3491          |
| <b>Hypertension (2017 AAP guideline), n (%)</b> |               |               |               |               |               |
| Hypertension                                    | 1498 (12.01)  | 222 (15.55)   | 210 (9.28)    | 488 (9.23)    | 578 (16.56)   |
| Elevated BP                                     | 832 (6.67)    | 52 (3.64)     | 78 (3.45)     | 326 (6.16)    | 376 (10.77)   |
| Normal BP                                       | 10139 (81.31) | 1154 (80.81)  | 1974 (87.27)  | 4474 (84.61)  | 2537 (72.67)  |
| <b>Sex ,n (%)</b>                               |               |               |               |               |               |
| Boys                                            | 6242 (50.06)  | 821 (57.49)   | 1251 (55.31)  | 2609 (49.34)  | 1561 (44.71)  |
| Girls                                           | 6227 (49.94)  | 607 (42.51)   | 1011 (44.69)  | 2679 (50.66)  | 1930 (55.29)  |
| Number of patients evaluated, n                 | 12368         | 1426          | 2262          | 5199          | 3481          |
| <b>BMI, Mean (±SD)</b>                          | 21.11 (±5.09) | 16.35 (±2.65) | 19.60 (±4.64) | 22.01 (±4.73) | 22.71 (±5.22) |
| Underweight, n (%)                              | 1657 (13.40)  | 102 (7.15)    | 213 (9.42)    | 697 (13.41)   | 645 (18.53)   |
| Normal, n (%)                                   | 6675 (53.97)  | 935 (65.57)   | 1274 (56.32)  | 2737 (52.64)  | 1729 (49.67)  |
| Overweight, n (%)                               | 1640 (13.26)  | 192 (13.46)   | 314 (13.88)   | 684 (13.16)   | 450 (12.93)   |
| Obesity, n (%)                                  | 2396 (19.22)  | 197 (13.81)   | 461 (20.38)   | 1081 (20.79)  | 657 (18.87)   |
| Number of patient evaluated, n                  | 12458         |               |               |               |               |
| <b>PMCA, n (%)</b>                              |               |               |               |               |               |
| Without chronic disease                         | 5592 (44.89)  | 393 (27.54)   | 809 (35.78)   | 2659 (50.3)   | 1731 (49.68)  |
| Non-complex chronic disease                     | 3661 (29.39)  | 556 (38.96)   | 813 (35.96)   | 1447 (27.37)  | 845 (24.25)   |
| Complex chronic disease                         | 3205 (25.73)  | 478 (33.5)    | 639 (28.26)   | 1180 (22.32)  | 908 (26.06)   |
| Cardiac                                         | 1417 (11.37)  | 268 (18.78)   | 278 (12.3)    | 552 (10.44)   | 319 (9.16)    |
| Craniofacial                                    | 57 (0.46)     | 18 (1.26)     | 9 (0.4)       | 18 (0.34)     | 12 (0.34)     |
| Dermatological                                  | 10 (0.08)     | 1 (0.07)      | 4 (0.18)      | 3 (0.06)      | 2 (0.06)      |
| Endocrinological                                | 1326 (10.64)  | 89 (6.24)     | 264 (11.68)   | 599 (11.33)   | 374 (10.73)   |
| IDDM                                            | 539 (4.33)    | 60 (4.20)     | 171 (7.56)    | 236 (4.46)    | 72 (2.06)     |
| NIDDM                                           | 321 (2.58)    | 12 (0.84)     | 37 (1.64)     | 168 (3.18)    | 104 (2.98)    |
| Gastrointestinal                                | 683 (5.48)    | 37 (2.59)     | 112 (4.95)    | 254 (4.81)    | 280 (8.04)    |
| Genetic                                         | 121 (0.97)    | 27 (1.89)     | 31 (1.37)     | 38 (0.72)     | 25 (0.72)     |
| Genitourinary                                   | 199 (1.60)    | 39 (2.73)     | 55 (2.43)     | 64 (1.21)     | 41 (1.18)     |
| Hematological                                   | 193 (1.55)    | 22 (1.54)     | 27 (1.19)     | 79 (1.49)     | 65 (1.87)     |
| Immunological                                   | 370 (2.97)    | 55 (3.85)     | 51 (2.26)     | 141 (2.67)    | 123 (3.53)    |
| Malignancy                                      | 494 (3.97)    | 36 (2.52)     | 72 (3.18)     | 194 (3.67)    | 192 (5.51)    |
| Mental health                                   | 1100 (8.83)   | 227 (15.91)   | 342 (15.13)   | 333 (6.3)     | 198 (5.68)    |
| Metabolic                                       | 379 (3.04)    | 18 (1.26)     | 56 (2.48)     | 189 (3.58)    | 116 (3.33)    |
| Musculoskeletal                                 | 190 (1.53)    | 18 (1.26)     | 22 (0.97)     | 66 (1.25)     | 84 (2.41)     |
| Neurological                                    | 1621 (13.01)  | 468 (32.8)    | 346 (15.3)    | 481 (9.1)     | 326 (9.36)    |
| Ophthalmological                                | 242 (1.94)    | 53 (3.71)     | 38 (1.68)     | 85 (1.61)     | 66 (1.89)     |

|                       |              |             |             |             |            |
|-----------------------|--------------|-------------|-------------|-------------|------------|
| Otologic              | 216 (1.73)   | 27 (1.89)   | 33 (1.46)   | 96 (1.82)   | 60 (1.72)  |
| Pulmonary/Respiratory | 623 (5.00)   | 131 (9.18)  | 157 (6.94)  | 191 (3.61)  | 144 (4.13) |
| Renal                 | 445 (3.57)   | 56 (3.92)   | 108 (4.78)  | 173 (3.27)  | 108 (3.1)  |
| Progressive           | 1825 (14.65) | 232 (16.26) | 341 (15.08) | 733 (13.87) | 519 (14.9) |

AAP, American Academy of Pediatrics; BP, blood pressure; BMI, body mass index; SD, standard deviation; (N)IDDM, (Non-) Insulin-dependent diabetes mellitus; PMCA, Pediatric Medical Complexity Algorithm
